# Supplementary material for: Invasiveness and Metastatic Aggressiveness in Small Differentiated Thyroid Cancers: Demography of Small Papillary Thyroid Carcinomas in the Swedish Population
Source: Springer Nature journal article supplement (doi:10.1007/s00268-019-05312-4), 2019-12-13
Supplement: MOESM1 [file 17628882]

**Supplemental tables**

***Table 1*** *Regional population distribution in Sweden in 2015* *and the number of operated patients per 100 000 inhabitants per region in each N disease group. The table shows even the operation ratio between N0/N1 and N1a/N1b disease groups.*

| Region | Population 2015 (9 851 017) | % of total population | Operations / 100,000 inhabitants | | | | | Ratio N0 / N1 | Ratio N1a / N1b |
| --- | --- | --- | --- | --- | --- | --- | --- | --- | --- |
| **All T1** | **N0** | **N1** | **N1a** | **N1b** |
| Northern | 884 384 | 9 | 8 | 6,8 | 1,47 | 0,68 | 0,68 | 4,63 | 1 |
| Uppsala-Orebro | 2 031 911 | 20.6 | 6,6 | 5 | 1,43 | 0,84 | 0,6 | 3,5 | 1,4 |
| Stockholm | 2 288 830 | 23.2 | 12,9 | 8,7 | 4 | 2,8 | 1,22 | 2,18 | 2,3 |
| South-Eastern | 1 031 177 | 10.5 | 3 | 3 | 0,58 | 0,39 | 0,19 | 5,17 | 2 |
| Western | 1 963 466 | 20 | 12,5 | 10,4 | 2,75 | 2,24 | 0,5 | 3,8 | 4,48 |
| Southern | 1 651 249 | 16.8 | 11,7 | 10,1 | 1,64 | 1,33 | 0,3 | 6,16 | 4,43 |
